# Supplementary material for: The synthesis and crystallographic structures of novel bora-oxazino-oxazolidine derivatives of resorcarene
Source: Royal Society of Chemistry journal article supplement (doi:10.1039/b206188k), 2002-01-01
Supplement: b206188k.doc [file b206188k.doc]

The Diastereoselective Closure Ring of the Calixresorcin[4]arene. The Synthesis and Crystallographic Structures of Novel Bora-oxazino-oxazolidine Derivatives of Calixresorcin[4]arene

Waldemar Iwanek, Roland Fröhlich and Pia Schwab

*E-mail:* [*waldemar.iwanek@uni-tuebingen.de*](mailto:waldemar.iwanek@uni-tuebingen.de)

[*iwanek@pu.kielce.pl*](mailto:iwanek@pu.kielce.pl)

*Experimental Section*

***General:*** 1H and 13C NMR spectra were measured at 25 oC on Bucker spectrometer at 400 MHz. Mass spectra were obtained on a Finnigan MAT-711A mass spectrometer. All solvents and chemicals were obtained commercially and used as received. Optical rotation were measured at 20 oC on Perkin Elmer-241 polarimeter.

***General Procedure for preparation of compound 3*:** The reaction was conducted without isolation of the aminomethylen derivative of calixresorc[4]arene (**2**), using 4 equivalents of formaldehyde and 4 equivalents of the chiral L-prolinol. The reaction was carried out in methanol. The solvent was rotary evaporated after 24 hours. Toluene and 5 equivalents of PhB(OH)2 were added to the residue, followed by azeotropic removal of water for 4 hours. The thus obtained product was crystallised from ethanol, yield 65 %.

***Spectroscopic data:***

**3a**: []20D = + 102.0 (c = 1.02 in CH2Cl2); 1H NMR(400 MHz, CDCl3):  = 0.98 (d, 3*J* (H,H) = 3.7 Hz, 12H, CH3), 1.08 (d, 3*J* (H,H) = 13.7 Hz, 12H, CH3), 1.51 (m, 4H, CH2), 1.73 (m, 8H, CH2), 1.89 (m, 8H, CH2), 2.13 (m, 8H, CH2), CH2), 3.02 (m, 4H, CH2), 3.42 (m, 4H, CH2), 3.56 (d, 3*J* (H,H) = 3 Hz, 4H, CH2), 3.64 (d, 3*J* (H,H) = 13.7 Hz, 4H, CH2), 3.83 (dd, 3*J* (H,H) = 6.7 Hz), 4H, CH2), 4.03 (d, 3*J* (H,H) = 13.7 Hz, 4H, CH2), 4.54 (q, 3*J* (H,H) = 6.7 Hz, 4H, CH), 7.23 (m, 20H, ArH), 7.59 (m, 4H, ArH), 8.62 (s, 4H, OH); 13C NMR (100 MHz, CDCl3):  = 22.27, 23.50, 24.40, 26.32, 30.83, 31.19, 31.74, 42.47, 51.63, 59.79, 67.42, 69.10, 107.05, 123.23, 124.26, 125.33, 127.12, 127.45, 129.00, 133.00, 149.97, 151.89.

MS (FAB): *m/z* 1508,9 (M+), 1322.7 (M+ - C11H14BNO), 1134.9 (M+ - 2* C11H14BNO), 947.7 (M+ - 3*C11H14BNO), 760.3 (M+ - 4* C11H14BNO). HR-MS (FAB): *m/z* 1508.8967, calc. 1508.8937.

**3b**: []20D = + 97.3 (c =1.05 in CH2Cl2); 1H NMR(400 MHz, CDCl3):  = 0.86 (d, 3*J* (H,H) = 6.8 Hz, 12H, CH3), 0.93 (d, 3*J* (H,H) = 6.8 Hz, 12H, CH3), 1.51 (m, 4H, CH2), 1.76 (m, 4H, CH2), 1.89 (m, 4H, CH2), 2.02 (m, 12H, CH2), CH2), 2.31 (m, 4H, CH2), 2.49 (m, 4H, CH2), 3.43 (m, 8H, CH2), 3.58 (m, 8H, CH2), 3.81 (d, 3*J* (H,H) = 15.2 Hz), 4H, CH2), 4.15 (m, 4H, CH2), 4.28 (d, 3*J* (H,H) = 15.2 Hz, 4H, CH2), 4.51 (q, 3*J* (H,H) = 6.8 Hz, 4H, CH), 7.25 (m, 16H, ArH), 7.31 (s, 4H, OH), 7.48 (m, 8H, ArH); 13C NMR (100 MHz, CDCl3):  = 22.41, 22,81, 23.47, 23.63, 26.08, 26.18, 26.28, 30.87, 30.91, 42.94, 51.42, 57.95, 66.10, 67.73, 104.06, 123.69, 124.17, 124.67, 127.13, 127.13, 127.34, 127.60, 132.43, 149.67, 150.04.MS (FAB): *m/z* 1508,9 (M+), 1322.6 (M+ - C11H14BNO), 1134.8 (M+ - 2* C11H14BNO), 947.8 (M+ - 3*C11H14BNO), 760.3 (M+ - 4* C11H14BNO). HR-MS (FAB): *m/z* 1508.8945, calc. 1508.8937.

***X-ray crystal structure analysis:***

**3a** - formula C92H112B4N4O12 * 3 C3H6O * 2/2 C3H6O, *M* = 1741.41, colorless crystal 0.40 x 0.30 x 0.20 mm, *a* = 15.381(1), *b* = 23.282(1), *c* = 29.512(1) Å, *V* = 10568.3(9) Å3, rcalc = 1.094 g cm-3, m = 0.72 cm-1, empirical absorption correction via SORTAV (0.972 £ *T* £ 0.986), *Z* = 4, orthorhombic, space group *P*212121 (No. 19), l = 0.71073 Å, *T* = 198 K, w and j scans, 63144 reflections collected (±*h*, ±*k*, ±*l*), [(sinq)/l] = 0.54 Å-1, 13815 independent (*R*int = 0.128) and 9215 observed reflections [*I* ³ 2 s(*I*)], 1089 refined parameters, *R* = 0.130, *wR*2 = 0.289, Flack parameter 0(4), isopropyl group C15A - C18A refined with split positions (0.51(2):0.49) and geometrical restrains, phenyl groups C20C - C25C and C20D - C25D refined as rigid groups, two of the five located solvent molecules only half occupied (SOF fixed to 0.5), solvent molecules refined with geometrical restrains and one isotropic thermal parameter for each, max. residual electron density 0.68 (-0.55) e Å-3, hydrogen’s calculated and refined as riding atoms;

**3b** - formula C92H112B4N4O12 * 2 CH3OH * 3 CH2Cl2, *M* = 1827.96, light yellow crystal 0.35 x 0.35 x 0.10 mm, *a* = 19.536(1), *c* = 21.881(1) Å, *V* = 7232.2(6) Å3, rcalc = 1.259 g cm-3, m = 2.42 cm-1, empirical absorption correction via SORTAV (0.920 £ *T* £ 0.976), *Z* = 3, trigonal, space group *P*31 (No. 144), l = 0.71073 Å, *T* = 198 K, w and j scans, 35372 reflections collected (±*h*, ±*k*, ±*l*), [(sinq)/l] = 0.62 Å-1, 15767 independent (*R*int = 0.074) and 9689 observed reflections [*I* ³ 2 s(*I*)], 1142 refined parameters, *R* = 0.078, *wR*2 = 0.183, Flack parameter 0.13(10), max. residual electron density 0.70 (-0.68) e Å-3 close to the CH2Cl2 solvent molecules, hydrogen’s calculated and refined as riding atoms.

Data sets were collected with a Nonius KappaCCD diffractometer, equipped with a rotating anode generator Nonius FR591. Programs used: data collection COLLECT (Nonius B.V., 1998), data reduction Denzo-SMN (Z. Otwinowski, W. Minor, *Methods in Enzymology*, **1997**, *276*, 307-326), absorption correction SORTAV (R.H. Blessing, *Acta Cryst.* **1995**, *A51*, 33-37; R.H. Blessing, *J. Appl. Cryst.* **1997**, *30*, 421-426), structure solution SHELXS-97 (G.M. Sheldrick, *Acta Cryst.* **1990**, *A46*, 467-473), structure refinement SHELXL-97 (G.M. Sheldrick, Universität Göttingen, 1997), graphics SCHAKAL (E. Keller, Universität Freiburg, 1997).

Crystallographic data (excluding structure factors) for the structures reported in this paper have been deposited with the Cambridge Crystallographic Data Centre as supplementary publication no. CCDC-183052 (**3a**), CCDC-183053 (**3b**). Copies of the data can be obtained free of charge on application to The Director, CCDC, 12 Union Road, CambridgeCB21EZ, UK [fax: int. code +44(1223)336-033, e-mail: deposit@ccdc.cam.ac.uk].
